# Supplementary material for: Alzheimer's disease pathology: pathways between chronic vascular risk factors and blood-brain barrier dysfunction in a cohort of patients with different types of dementia
Source: Front Aging Neurosci. 2023 May 4;15:1088140. doi: 10.3389/fnagi.2023.1088140 (PMC10194826; doi:10.3389/fnagi.2023.1088140)
Supplement: Supplementary file 1 [file Table_1.XLSX]

## Sheet: Pearson Correlation
Table S2 Relationships among Qalb, neuropathological biomarkers of AD and chronic vascular risk factors (Part 1, by pearson correlation models)
		Qalb	Aβ1-42 (pg/ml)	Aβ1-40 (pg/ml)	Aβ1-42/Aβ1-40	p-Tau (pg/ml)	t-Tau (pg/ml)	t-Tau/Aβ1-42
Qalb	Pearson Correlation	1	-0.191	-0.255	-0.037	-0.254	-0.229	0.153
	P value	na	0.101	0.046	0.777	0.029	0.048	0.193
	N	95	75	62	62	74	75	74
HT	Pearson Correlation	-0.009	0.301	0.146	0.428	-0.032	-0.077	-0.215
	P value	0.934	0.009	0.259	0.001	0.784	0.51	0.066
	N	95	75	62	62	74	75	74
SBP	Pearson Correlation	0.021	-0.008	0.041	-0.018	-0.117	-0.097	-0.008
	P value	0.837	0.942	0.751	0.889	0.321	0.409	0.947
	N	95	75	62	62	74	75	74
DBP	Pearson Correlation	-0.088	-0.091	-0.098	0.076	-0.049	0.031	0.047
	P value	0.395	0.437	0.447	0.559	0.677	0.795	0.692
	N	95	75	62	62	74	75	74
DM	Pearson Correlation	0.362	-0.037	-0.171	0.19	-0.213	-0.265	-0.126
	P value	0	0.754	0.183	0.139	0.068	0.021	0.286
	N	95	75	62	62	74	75	74
GHb	Pearson Correlation	0.426	-0.089	-0.221	0.193	-0.15	-0.305	-0.085
	P value	0	0.446	0.085	0.132	0.202	0.008	0.474
	N	95	75	62	62	74	75	74
Glu	Pearson Correlation	0.44	0.046	0.026	0.187	-0.126	-0.142	-0.081
	P value	0	0.695	0.841	0.145	0.284	0.226	0.493
	N	95	75	62	62	74	75	74
CVSD	Pearson Correlation	-0.056	0.373	0.103	0.301	-0.037	0.045	0.001
	P value	0.59	0.001	0.424	0.018	0.754	0.703	0.992
	N	95	75	62	62	74	75	74
Fazakes	Pearson Correlation	0.026	0.175	0.01	0.289	-0.14	-0.222	-0.223
	P value	0.805	0.134	0.938	0.023	0.236	0.056	0.056
	N	95	75	62	62	74	75	74
HLP	Pearson Correlation	-0.064	-0.213	0.018	-0.182	-0.017	-0.102	-0.045
	P value	0.54	0.067	0.887	0.156	0.885	0.384	0.703
	N	95	75	62	62	74	75	74
TG	Pearson Correlation	0.057	-0.253	-0.202	-0.022	-0.103	-0.254	-0.038
	P value	0.584	0.028	0.115	0.866	0.384	0.028	0.746
	N	95	75	62	62	74	75	74
CHO	Pearson Correlation	-0.048	-0.275	-0.012	-0.236	0.02	-0.006	0.049
	P value	0.646	0.017	0.929	0.064	0.867	0.956	0.676
	N	95	75	62	62	74	75	74
HDL	Pearson Correlation	-0.185	0.002	0.102	0.017	0.021	0.093	0.043
	P value	0.073	0.986	0.431	0.898	0.859	0.429	0.714
	N	95	75	62	62	74	75	74
LDL	Pearson Correlation	-0.068	-0.075	-0.111	0.025	-0.141	-0.078	-0.04
	P value	0.513	0.521	0.392	0.844	0.231	0.504	0.734
	N	95	75	62	62	74	75	74
BMI	Pearson Correlation	-0.156	0.209	-0.012	0.289	-0.056	-0.167	-0.097
	P value	0.131	0.072	0.927	0.023	0.638	0.152	0.41
	N	95	75	62	62	74	75	74
Hhcy	Pearson Correlation	-0.052	-0.055	-0.021	-0.111	0.227	0.026	0.156
	P value	0.614	0.64	0.87	0.392	0.051	0.826	0.186
	N	95	75	62	62	74	75	74
Hcy	Pearson Correlation	-0.041	-0.004	-0.121	0.017	0.169	0.022	0.178
	P value	0.693	0.973	0.348	0.893	0.151	0.85	0.13
	N	95	75	62	62	74	75	74
FA	Pearson Correlation	0.146	0.044	0.042	-0.046	-0.01	0.086	0.043
	P value	0.158	0.711	0.745	0.72	0.93	0.464	0.718
	N	95	75	62	62	74	75	74
VitB12	Pearson Correlation	0.114	-0.043	-0.371	0.057	-0.208	-0.228	0.028
	P value	0.272	0.716	0.003	0.662	0.076	0.049	0.811
	N	95	75	62	62	74	75	74
Fer	Pearson Correlation	-0.026	-0.039	-0.144	0.111	0.01	-0.161	-0.089
	P value	0.806	0.741	0.266	0.389	0.933	0.169	0.451
	N	95	75	62	62	74	75	74
SA	Pearson Correlation	0.071	-0.183	-0.258	0.053	-0.145	-0.219	-0.031
	P value	0.496	0.116	0.043	0.68	0.217	0.059	0.792
	N	95	75	62	62	74	75	74
APOEɛ4 alle	Pearson Correlation	-0.138	-0.123	0.158	-0.237	0.11	0.12	0.019
	P value	0.181	0.294	0.22	0.063	0.351	0.303	0.871
	N	95	75	62	62	74	75	74
Aβ, amyloid β; Qalb, cerebrospinal fluid/serum albumin quotient; HT, hypertension; SBP, systolic blood pressure; DBP, diastolic blood pressure; T2DM, type 2 diabetes mellitus; GHb, glycosylated hemoglobin; FBG, fasting blood glucose; CVD, cardiac-cerebral vascular Disease; HLP, hyperlipidemia; TG, triglyceride; CHO, cholesterol; HDL, high-density lipoprotein cholesterol; LDL-c, low-density lipopr…

## Sheet: Partial Correlation
Table S2 Relationships among Qalb, neuropathological biomarkers of AD and chronic vascular risk factors (Part 2, by partial correlation models after adjusting the variables of gender, age, education, course of disease, and diagnosis )
		Qalb	Aβ1-42 (pg/ml)	Aβ1-40 (pg/ml)	p-Tau (pg/ml)	t-Tau (pg/ml)
Qalb	Correlation	1	-0.235	-0.267	-0.171	-0.087
	P value	na	0.081	0.047	0.208	0.526
APOEɛ4 alle	Correlation	-0.232	-0.12	0.147	0.162	0.137
	P value	0.085	0.379	0.28	0.233	0.314
HT	Correlation	0.006	0.42	0.164	-0.026	-0.041
	P value	0.966	0.001	0.226	0.849	0.764
SBP	Correlation	-0.215	0.083	0.087	-0.062	0.051
	P value	0.111	0.542	0.524	0.65	0.707
DBP	Correlation	-0.2	0.078	-0.019	-0.115	0.052
	P value	0.139	0.568	0.888	0.398	0.706
DM	Correlation	0.246	0.062	-0.127	-0.163	-0.199
	P value	0.068	0.65	0.35	0.231	0.142
GHb	Correlation	0.378	0.042	-0.141	-0.06	-0.225
	P value	0.004	0.757	0.298	0.659	0.095
Glu	Correlation	0.276	0.133	0.005	-0.079	-0.026
	P value	0.039	0.329	0.968	0.563	0.848
CVSD	Correlation	-0.045	0.368	0.02	-0.099	-0.027
	P value	0.745	0.005	0.884	0.467	0.844
Fazakes	Correlation	0.024	0.233	0.014	-0.168	-0.231
	P value	0.861	0.083	0.918	0.216	0.086
HLP	Correlation	-0.226	-0.079	0.081	-0.018	-0.028
	P value	0.094	0.564	0.554	0.898	0.836
TG	Correlation	-0.137	-0.076	0.018	-0.097	-0.192
	P value	0.313	0.578	0.894	0.479	0.157
CHO	Correlation	-0.11	-0.16	0.018	-0.015	0.045
	P value	0.418	0.24	0.895	0.912	0.74
HDL	Correlation	0.012	0.01	-0.049	-0.086	0.048
	P value	0.931	0.94	0.721	0.527	0.724
LDL	Correlation	-0.091	0.011	-0.052	-0.124	-0.069
	P value	0.503	0.936	0.702	0.364	0.616
BMI	Correlation	-0.192	0.265	-0.014	-0.045	-0.194
	P value	0.156	0.048	0.916	0.742	0.153
Hhcy	Correlation	-0.115	-0.154	-0.022	0.257	0.038
	P value	0.399	0.258	0.873	0.056	0.781
Hcy	Correlation	-0.005	-0.025	-0.146	0.153	0.023
	P value	0.973	0.857	0.282	0.261	0.869
FA	Correlation	0.3	0.066	-0.016	-0.045	0.066
	P value	0.025	0.629	0.908	0.741	0.627
VitB12	Correlation	0.266	-0.196	-0.372	-0.177	-0.159
	P value	0.047	0.148	0.005	0.191	0.242
Fer	Correlation	0.032	0.141	0.087	-0.026	-0.128
	P value	0.817	0.3	0.523	0.849	0.347
SA	Correlation	-0.034	-0.007	-0.108	0.031	-0.033
	P value	0.803	0.96	0.429	0.82	0.808
Aβ, amyloid β; Qalb, cerebrospinal fluid/serum albumin quotient; HT, hypertension; SBP, systolic blood pressure; DBP, diastolic blood pressure; T2DM, type 2 diabetes mellitus; GHb, glycosylated hemoglobin; FBG, fasting blood glucose; CVD, cardiac-cerebral vascular Disease; HLP, hyperlipidemia; TG, triglyceride; CHO, cholesterol; HDL, high-density lipoprotein cholesterol; LDL-c, low-density lipopr…

## Sheet: Linear regression
Table S2 Relationships among Qalb, neuropathological biomarkers of AD and chronic vascular risk factors (Part 3, by linear regression models after adjusting the variables of gender, age, education, course of disease, and diagnosis )
	Qalb					Aβ1-42 (pg/ml)					Aβ1-40 (pg/ml)					p-Tau (pg/ml)					t-Tau (pg/ml)
	B	SE	P value	lower bound	upper bound	B	SE	P value	lower bound	upper bound	B	SE	P value	lower bound	upper bound	B	SE	P value	lower bound	upper bound	B	SE	P value	lower bound	upper bound
Qalb	na	na	na	na	na	-26.729	10.919	0.017	-48.518	-4.941	-349.271	160.248	0.034	-670.414	-28.127	-2.53	1.444	0.084	-5.413	0.353	-15.497	11.392	0.178	-38.231	7.236
APOE ɛ4 alle	-1.893	1.073	0.081	-4.024	0.239	-103.218	102.398	0.317	-307.55	101.113	1666.25	1533.21	0.282	-1406.37	4738.88	16.295	13.086	0.217	-9.824	42.414	132.947	103.326	0.203	-73.237	339.13
HT	-0.36	0.966	0.711	-2.279	1.56	185.369	89.137	0.041	7.5	363.239	1133.49	1330.16	0.398	-1532.21	3799.2	-1.144	12.194	0.926	-25.483	23.195	-42.932	93.044	0.646	-228.598	142.734
SBP	-0.011	0.027	0.675	-0.066	0.043	-0.377	2.675	0.888	-5.714	4.96	17.287	42.935	0.689	-68.757	103.33	-0.285	0.348	0.416	-0.98	0.41	-0.734	2.71	0.787	-6.142	4.674
DBP	-0.015	0.038	0.687	-0.091	0.06	-2.055	3.606	0.571	-9.25	5.14	-38.524	58.018	0.509	-154.795	77.748	-0.297	0.508	0.56	-1.312	0.717	-0.268	3.664	0.942	-7.579	7.042
DM	3.382	0.932	0	1.531	5.234	-46.154	91.396	0.615	-228.532	136.223	-1540.39	1310.36	0.245	-4166.4	1085.62	-19.197	11.818	0.109	-42.786	4.392	-192.834	89.83	0.035	-372.086	-13.581
GHb	1.163	0.266	0	0.634	1.692	-23.55	25.361	0.356	-74.157	27.056	-598.007	376.573	0.118	-1352.68	156.663	-3.697	3.902	0.347	-11.486	4.093	-65.121	24.637	0.01	-114.282	-15.959
Glu	1.443	0.324	0	0.799	2.087	-20.416	34.197	0.552	-88.654	47.822	-87.655	587.968	0.882	-1265.97	1090.66	-5.58	4.408	0.21	-14.378	3.218	-38.329	34.444	0.27	-107.062	30.403
CVSD	-0.69	1.216	0.572	-3.106	1.725	323.563	109.894	0.004	104.274	542.852	320.089	1820.41	0.861	-3328.09	3968.27	-7.166	14.965	0.634	-37.037	22.705	62.764	118.045	0.597	-172.791	298.319
Fazakes	0.086	0.568	0.88	-1.043	1.215	56.208	52.832	0.291	-49.216	161.633	-179.023	797.325	0.823	-1776.9	1418.85	-8.835	6.969	0.209	-22.745	5.075	-111.935	52.267	0.036	-216.232	-7.637
HLP	-1.049	0.944	0.27	-2.925	0.827	-130.454	86.522	0.136	-303.106	42.198	458.391	1297.55	0.725	-2141.95	3058.74	-2.593	11.532	0.823	-25.612	20.426	-73.003	88.723	0.413	-250.047	104.042
TG	0.531	0.606	0.383	-0.674	1.736	-93.606	53.064	0.082	-199.493	12.282	-549.665	797.905	0.494	-2148.7	1049.37	-7.55	8.877	0.398	-25.269	10.17	-120.837	53.022	0.026	-226.64	-15.034
CHO	-0.326	0.399	0.417	-1.119	0.468	-75.738	34.555	0.032	-144.692	-6.784	-18.109	612.796	0.977	-1246.18	1209.96	-0.602	4.632	0.897	-9.847	8.642	-12.061	36.216	0.74	-84.329	60.208
HDL	-2.069	1.127	0.07	-4.308	0.171	42.65	107.81	0.694	-172.481	257.781	-511.598	2277.8	0.823	-5076.41	4053.22	-3.907	13.877	0.779	-31.605	23.792	39.826	109.308	0.717	-178.295	257.947
LDL	-0.008	0.014	0.556	-0.037	0.02	-0.163	1.186	0.891	-2.53	2.203	-4.622	16.176	0.776	-37.04	27.796	-0.159	0.151	0.296	-0.461	0.143	-0.711	1.199	0.555	-3.104	1.682
BMI	-0.222	0.121	0.069	-0.462	0.018	13.254	11.434	0.25	-9.563	36.071	-30.447	167.752	0.857	-366.63	305.735	-0.223	1.485	0.881	-3.187	2.741	-13.863	11.584	0.236	-36.978	9.252
Hhcy	-0.751	0.942	0.427	-2.624	1.121	-37.372	86.976	0.669	-210.93	136.185	27.773	1334.64	0.983	-2646.9	2702.45	20.546	10.996	0.066	-1.402	42.494	43.514	88.131	0.623	-132.35	219.377
Hcy	-0.021	0.065	0.748	-0.149	0.107	-0.664	6.86	0.923	-14.353	13.024	-105.698	112.59	0.352	-331.334	119.937	0.869	0.876	0.325	-0.88	2.617	1.248	6.953	0.858	-12.625	15.122
FA	0.134	0.092	0.148	-0.048	0.317	4.544	8.07	0.575	-11.559	20.647	-35.437	133.362	0.791	-302.7	231.826	-0.078	1.041	0.94	-2.157	2	5.172	8.175	0.529	-11.142	21.485
VitB12	0.001	0.001	0.498	-0.001	0.003	-0.086	0.09	0.341	-0.266	0.093	-4.682	1.493	0.003	-7.675	-1.689	-0.014	0.012	0.249	-0.037	0.01	-0.129	0.091	0.159	-0.31	0.052
Fer	-0.004	0.003	0.21	-0.01	0.002	-0.192	0.297	0.52	-0.785	0.401	1.524	7.439	0.838	-13.383	16.432	0.027	0.039	0.49	-0.051	0.104	-0.117	0.302	0.699	-0.72	0.485
SA	0.044	1.219	0.971	-2.378	2.466	-156.221	122.391	0.206	-400.45	88.007	-1855.38	2062.57	0.372	-5988.86	2278.1	-4.08	15.977	0.799	-35.971	27.81	-81.093	125.163	0.519	-330.852	168.666
Aβ, amyloid β; Qalb, cerebrospinal fluid/serum albumin quotient; HT, hypertension; SBP, systolic blood pressure; DBP, diastolic blood pressure; T2DM, type 2 diabetes mellitus; GHb, glycosylated hemoglobin; FBG, fasting blood glucose; CVD, cardiac-cerebral vascular Disease; HLP, hyperlipidemia; TG, triglyceride; CHO, cholesterol; HDL, high-density lipoprotein cholesterol; LDL-c, low-density lipopr…
